# Supplementary material for: A stable liquid–solid interface of a lithium metal anode enabled by micro-region meshing
Source: Royal Society of Chemistry journal article supplement (doi:10.1039/d1nr06859h), 2021-12-06
Supplement: d1nr06859h1.pdf [file d1nr06859h1.pdf]

## Supporting information

### **Stable liquid-solid interface of lithium metal anode enabled by micro-region meshing**

Jianzong Man, Kun Liu, Yehong Du, Xinyu Wang, Song Li, Zhongsheng Wen, Shijun Ji, Juncai Sun\*

Institute of Materials and Technology, Dalian Maritime University,  
Dalian, 116026, China

\*Corresponding author: [sunjc@dlnu.edu.cn](mailto:sunjc@dlnu.edu.cn) (J. Sun)

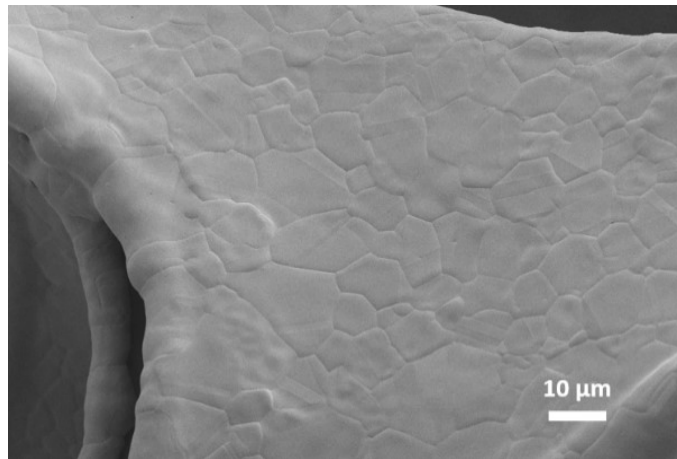

Fig. S1 SEM image of NF.

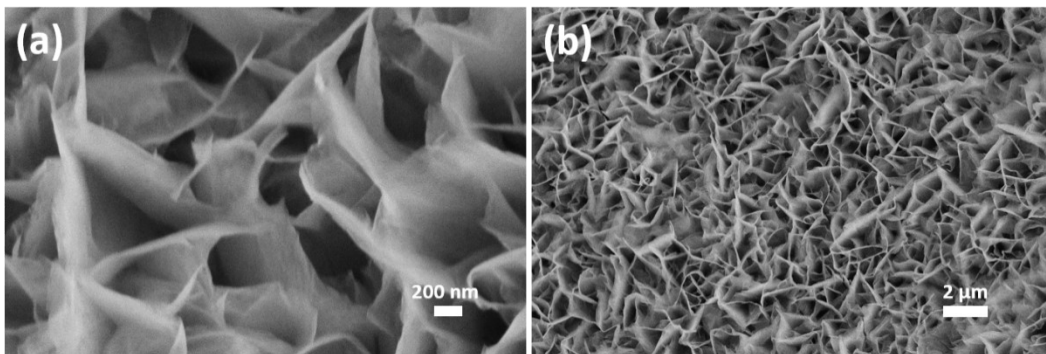

Fig. S2 SEM image of Ni<sub>3</sub>N@NF precursor.

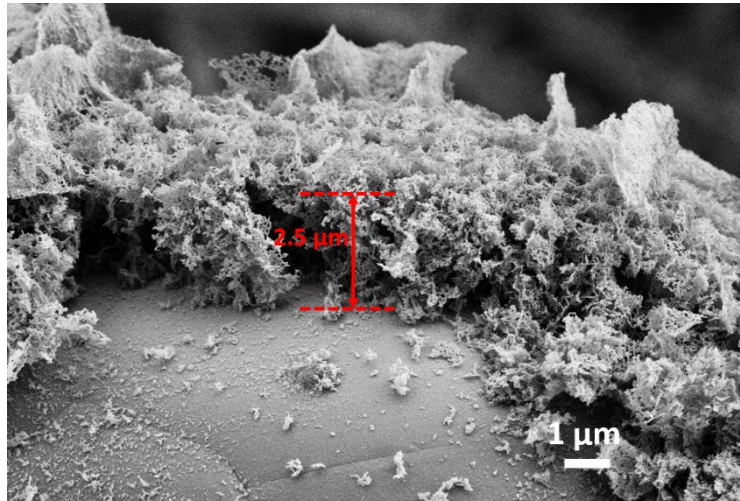

Fig. S3 The thickness of Ni<sub>3</sub>N nanosheet arrays.

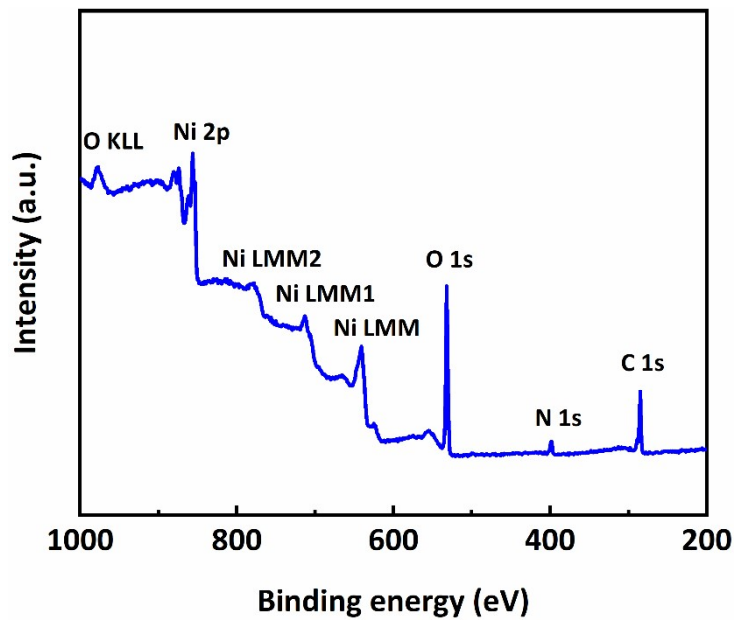

Fig. S4 The XPS survey spectra of Ni<sub>3</sub>N@NF.

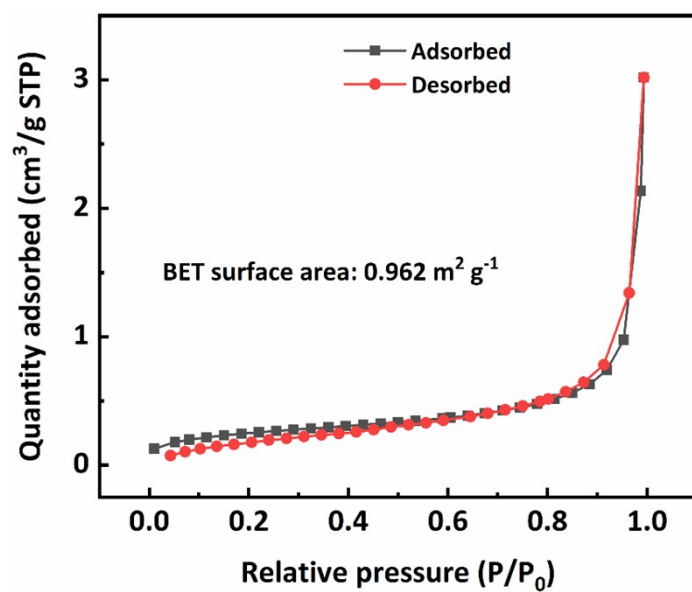

Fig. S5 N<sub>2</sub> adsorption-desorption isotherms of Ni<sub>3</sub>N@NF.

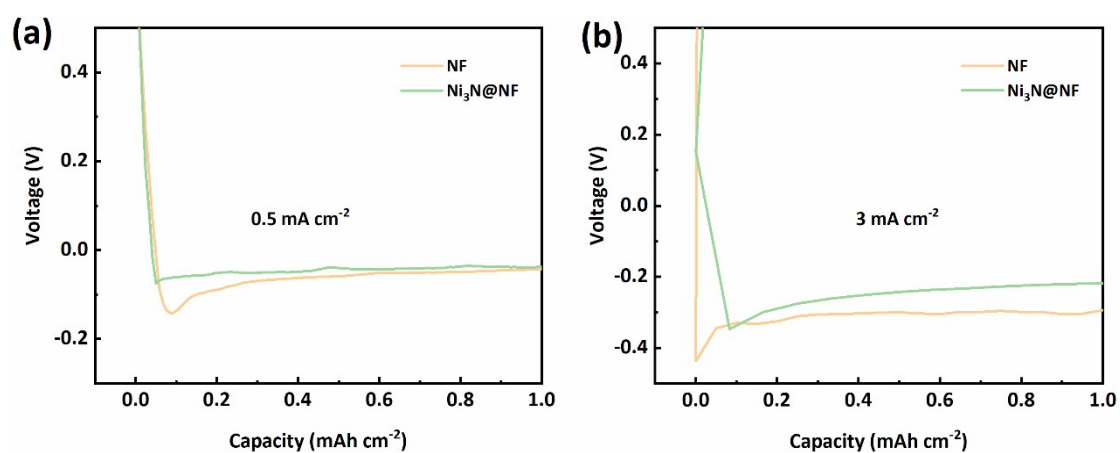

Fig. S6 Comparison of nucleation overpotential of Ni<sub>3</sub>N@NF and NF at (a) 0.5 mA cm<sup>-2</sup> and (b) 3 mA cm<sup>-2</sup>.

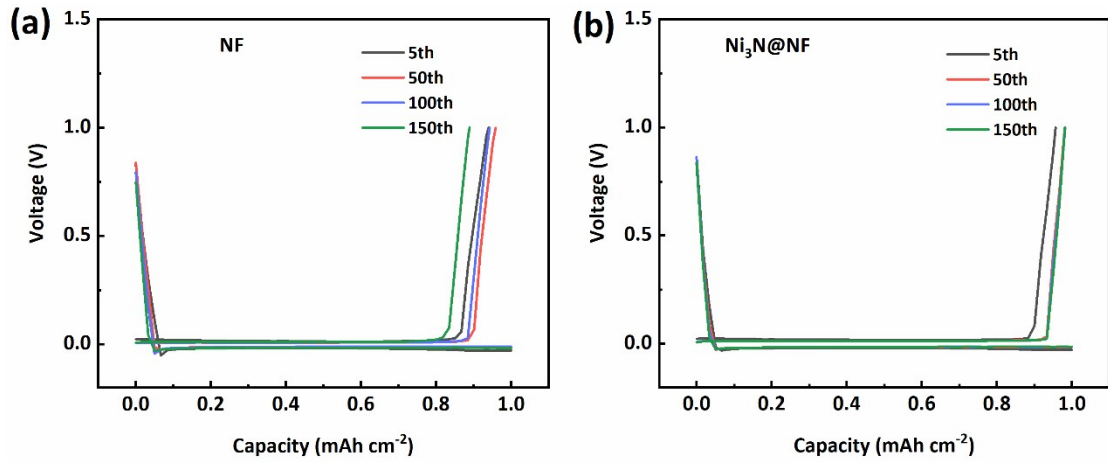

Fig. S7 Galvanostatic charge-discharge curves at different cycles for (a) NF and (b) Ni<sub>3</sub>N@NF.

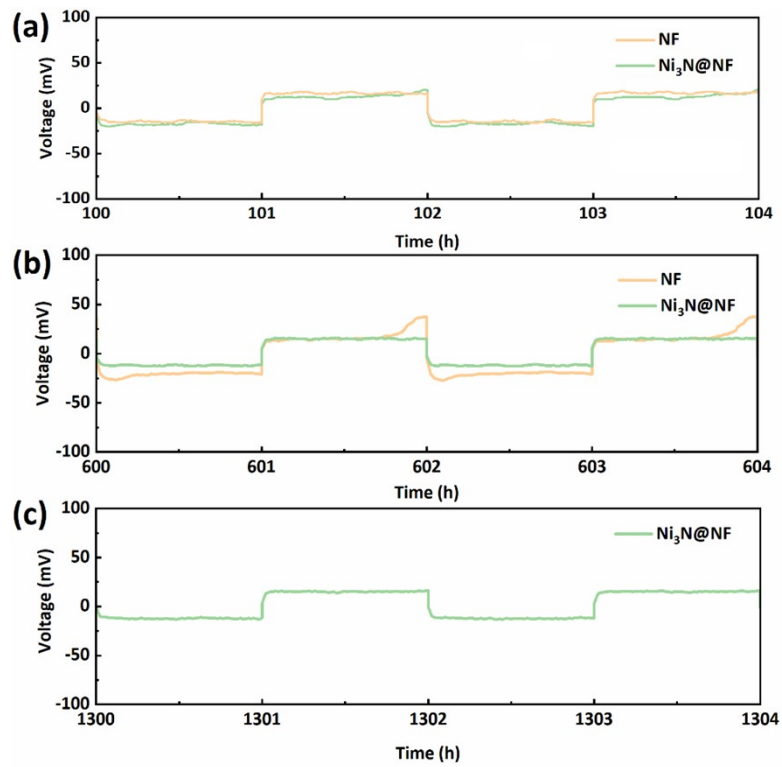

Fig. S8 Partially magnified periods of Fig. 4f.

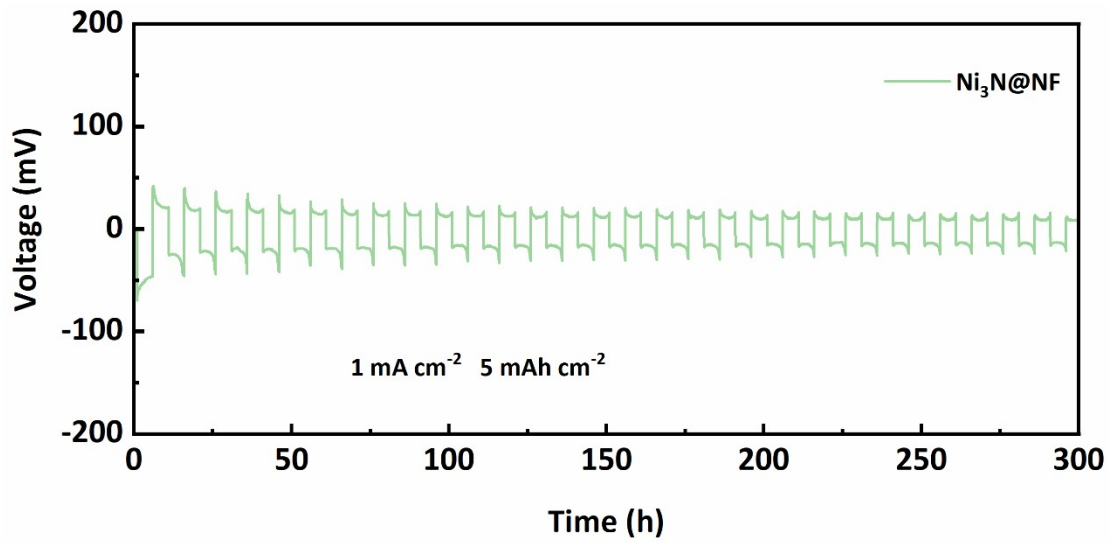

Fig. S9 The galvanostatic charge/discharge profile of  $\text{Ni}_3\text{N@NF-Li}$  symmetrical cell at the current density of  $1 \text{ mA cm}^{-2}$  with a capacity of  $5 \text{ mAh cm}^{-2}$ .

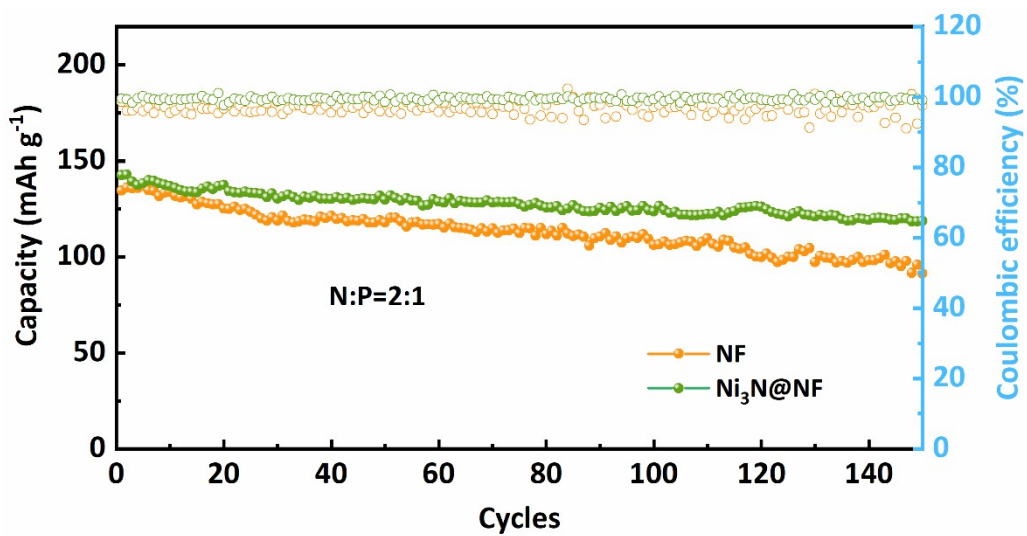

Fig. S10 Comparison of performance of full cells when the N/P is 2:1.

Table S1 Comparison of symmetrical cell cycling performance between this work and reported literature with the similar electrode configuration.

| Composite Li metal<br>anode | Current density-capacity<br>(mA cm <sup>-2</sup> - mAh cm <sup>-2</sup> ) | Hysteresis Voltage<br>(mV) | Cycling time<br>(h) | Reference |
|-----------------------------|---------------------------------------------------------------------------|----------------------------|---------------------|-----------|
| NCNT/NF/Li                  | 1-1                                                                       | 29                         | 1000                | 1         |
| NPNF                        | 1-1                                                                       | 200                        | 700                 | 2         |
| MCuF                        | 1-2                                                                       | 11                         | 600                 | 3         |
| LiF@Li matrix               | 1-1                                                                       | 40                         | 600                 | 4         |
| CuF@Au                      | 0.5-0.5                                                                   | ~10                        | 250                 | 5         |
| PNNF                        | 1-1                                                                       | 15                         | 800                 | 6         |
| Li-NiO/NF                   | 1-1                                                                       | 39                         | 1000                | 7         |
|                             | 2-1                                                                       | ~100                       | 200                 |           |
| Ni <sub>3</sub> N@NF-Li     | 1-1                                                                       | 16                         | 1500                | This work |
|                             | 3-1                                                                       | ~80                        | 200                 |           |

## References

1. Z. Zhang, J. Wang, X. Yan, S. Zhang, W. Yang, Z. Zhuang and W. Han, *Energy Storage Materials*, 2020, 29, 332-340.
2. S. Liu, H. Zhang, X. Liu, Y. Yang, C. Chi, S. Wang, J. Xue, T. Hao, J. Zhao and Y. Li, *J. Energy Chem.*, 2020.
3. Y. Zhou, K. Zhao, Y. Han, Z. Sun, H. Zhang, L. Xu, Y. Ma and Y. Chen, *J. Mater. Chem. A*, 2019, 7, 5712-5718.

4. Y. Feng, C. Zhang, B. Li, S. Xiong and J. Song, *J. Mater. Chem. A*, 2019, 7, 6090-6098.
5. G. Hou, Q. Sun, Q. Ai, X. Ren, X. Xu, H. Guo, S. Guo, L. Zhang, J. Feng, F. Ding, P. M. Ajayan, P. Si and L. Ci, *J. Power Sources*, 2019, 416, 141-147.
6. J. Zhu, J. Chen, Y. Luo, S. Sun, L. Qin, H. Xu, P. Zhang, W. Zhang, W. Tian and Z. Sun, *Energy Storage Materials*, 2019, 23, 539-546.
7. Q. Zhang, W. Bai, C. Sun, X. Liu, K. Wang and J. Chen, *Chem. Eng. J.*, 2021, 405, 127022.
